# Supplementary material for: Major sex differences in allele frequencies for X chromosomal variants in both the 1000 Genomes Project and gnomAD
Source: PubMed Central journal article supplement (PMC9187127; doi:10.1371/journal.pgen.1010231), 2022-05-31
Supplement: pgen.1010231.s031.pdf [file pgen.1010231.s031.pdf]

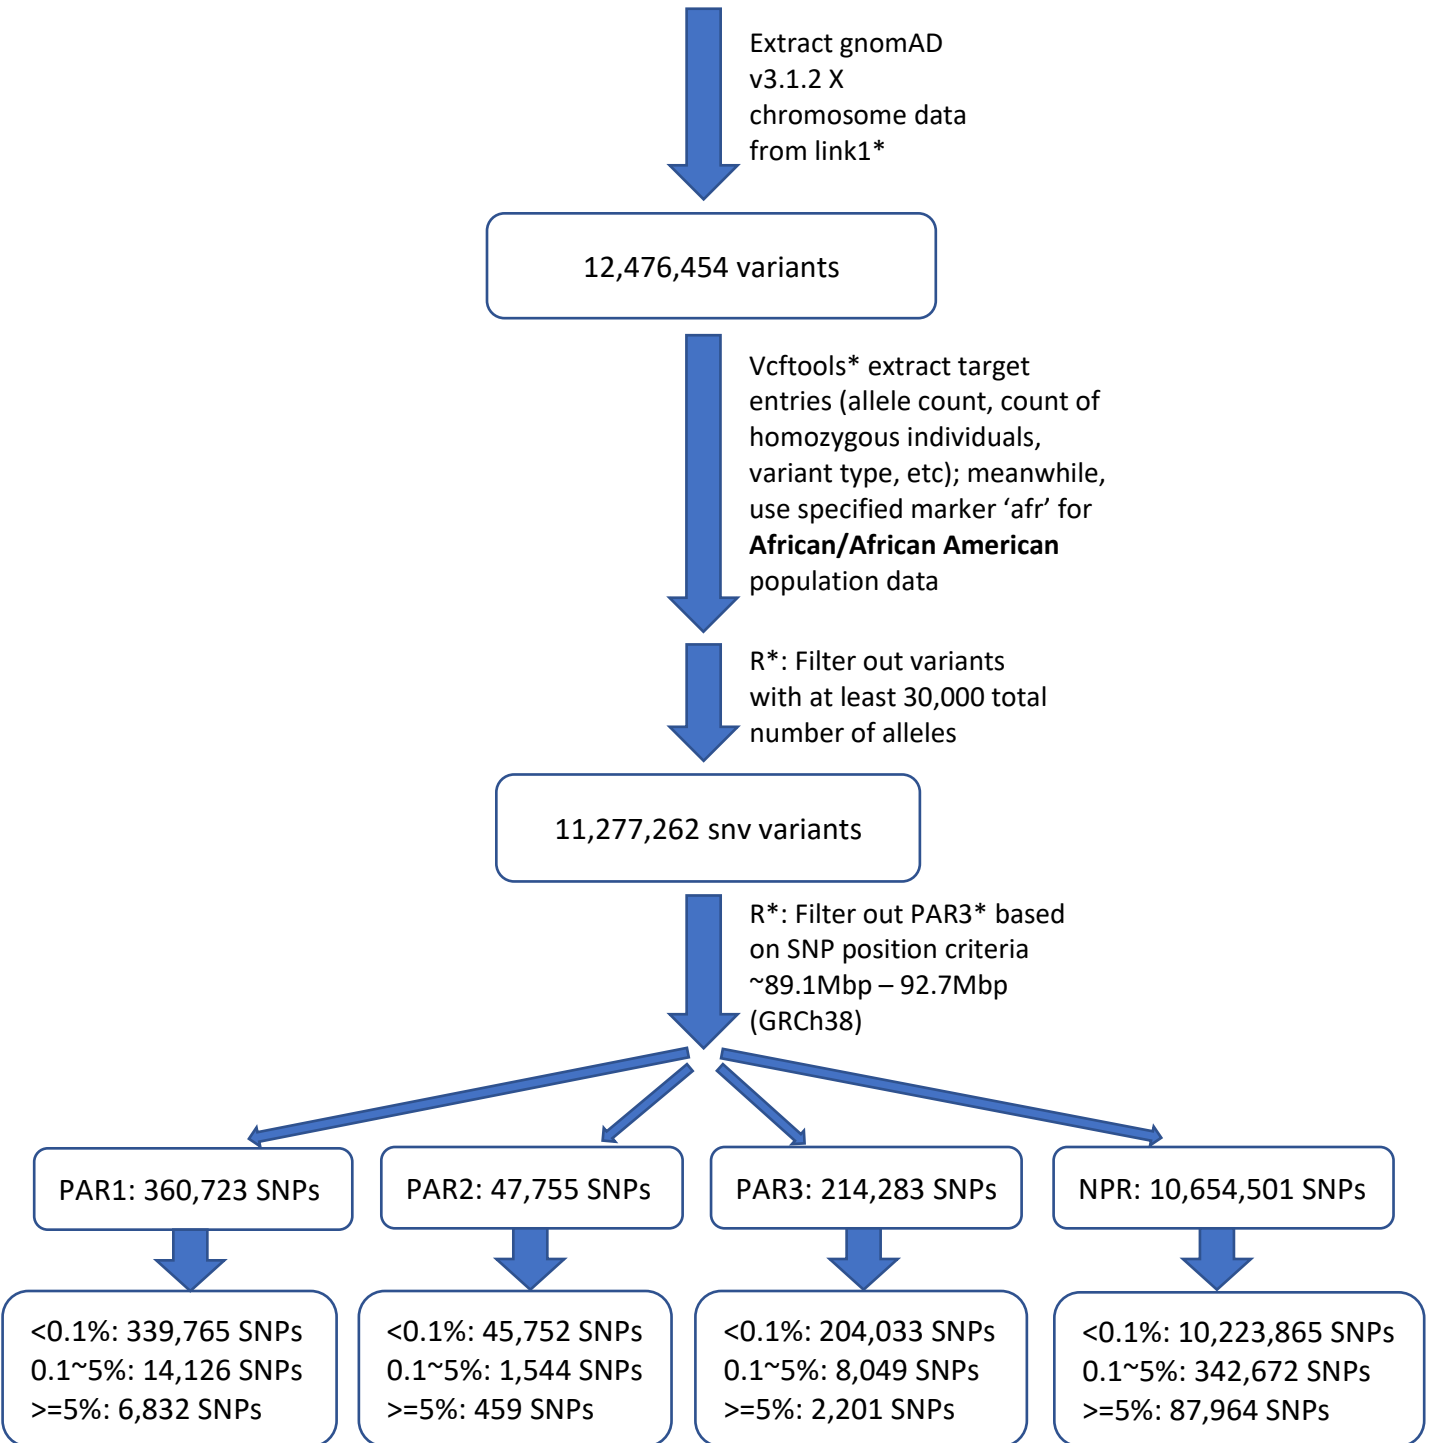

\*link1: <https://storage.googleapis.com/gcp-public-data--gnomad/release/3.1.2/vcf/genomes/gnomad.genomes.v3.1.2.sites.chrX.vcf.bgz>

\*PLINK: 1.90 beta version 6.20 64-bit

\*vcftools: version 0.1.17

\*R: version 3.5.3

\*PAR3: No global consensus yet
