# Supplementary material for: Major sex differences in allele frequencies for X chromosomal variants in both the 1000 Genomes Project and gnomAD
Source: PubMed Central journal article supplement (PMC9187127; doi:10.1371/journal.pgen.1010231), 2022-05-31
Supplement: pgen.1010231.s034.pdf [file pgen.1010231.s034.pdf]

## Supplementary Note 2

### **Comparison of genotypes for selected SNPs between phase 3 and high coverage whole genome sequence data from the 1000 Genomes Project.**

In total, 50, 10, 20, and 50 SNPs, respectively from NPR, PAR1, PAR2, and PAR3, with the smallest sdMAF p-values in the phase 3 data were first selected.

Among these SNPs, 4, 10, 10, and 9 SNPs, respectively from NPR, PAR1, PAR2, and PAR3, were also bi-allelic in the high coverage data and had no missingness in both sets of data.

Each page represents the results for one SNP, and SNPs are ordered by the GRCh37 positions.

Within each page, the position of the SNP in phase 3 (build GRCh37) and high coverage (GRCh38) are first provided. Next is the female - male sdMAF difference and the sdMAF p-value. The REF and ALT alleles are also provided for each build. Finally, the counts of the agreement of the genotype calls between the phase 3 and the high coverage data are provided, separately by sex.

Region: PAR1

rs number (GRCh37 phase3): .

SNP position (GRCh37) = 2695860 ; Female-Male Sex Difference in MAF (GRCh37 phase3) = -0.3727 ;  
sdMAF P-value = 8.20918418869952e-268

SNP position (GRCh38) = 2777819 ; Female-Male Sex Difference in MAF (High Coverage) = -0.3739 ;  
sdMAF P-value = 7.863953925689e-273

Table A: REF/ALT

|                 | REF | ALT |
|-----------------|-----|-----|
| Phase3 (GRCh37) | A   | G   |
| High Coverage   | A   | G   |

Table B: male

|          | aa | Aa  | AA  | Total_P3 |
|----------|----|-----|-----|----------|
| aa       | 99 | 3   | 0   | 102      |
| Aa       | 0  | 917 | 0   | 917      |
| AA       | 0  | 1   | 213 | 214      |
| Total_HC | 99 | 921 | 213 | 1233     |

Table C: female

|          | aa  | Aa  | AA | Total_P3 |
|----------|-----|-----|----|----------|
| aa       | 892 | 1   | 0  | 893      |
| Aa       | 0   | 317 | 0  | 317      |
| AA       | 0   | 2   | 59 | 61       |
| Total_HC | 892 | 320 | 59 | 1271     |

Note1. Row (Phase 3 GRCh37); Column (High Coverage GRCh38)

Note2. 'a': REF; 'A': ALT

Region: PAR1

rs number (GRCh37 phase3): .

SNP position (GRCh37) = 2696560 ; Female-Male Sex Difference in MAF (GRCh37 phase3) = -0.376 ;  
sdMAF P-value = 5.54370357180522e-289

SNP position (GRCh38) = 2778519 ; Female-Male Sex Difference in MAF (High Coverage) = -0.3748 ;  
sdMAF P-value = 2.65832322082409e-287

Table D: REF/ALT

|                 | REF | ALT |
|-----------------|-----|-----|
| Phase3 (GRCh37) | G   | A   |
| High Coverage   | G   | A   |

Table E: male

|          | aa | Aa  | AA  | Total_P3 |
|----------|----|-----|-----|----------|
| aa       | 98 | 1   | 0   | 99       |
| Aa       | 0  | 940 | 0   | 940      |
| AA       | 0  | 2   | 192 | 194      |
| Total_HC | 98 | 943 | 192 | 1233     |

Table F: female

|          | aa  | Aa  | AA | Total_P3 |
|----------|-----|-----|----|----------|
| aa       | 912 | 1   | 0  | 913      |
| Aa       | 0   | 302 | 1  | 303      |
| AA       | 0   | 0   | 55 | 55       |
| Total_HC | 912 | 303 | 56 | 1271     |

Note1. Row (Phase 3 GRCh37); Column (High Coverage GRCh38)

Note2. 'a': REF; 'A': ALT

Region: PAR1

rs number (GRCh37 phase3): .

SNP position (GRCh37) = 2696892 ; Female-Male Sex Difference in MAF (GRCh37 phase3) = -0.4001 ;  
sdMAF P-value < 1e-300

SNP position (GRCh38) = 2778851 ; Female-Male Sex Difference in MAF (High Coverage) = -0.40047 ;  
sdMAF P-value < 1e-300

Table G: REF/ALT

|                 | REF | ALT |
|-----------------|-----|-----|
| Phase3 (GRCh37) | G   | A   |
| High Coverage   | G   | A   |

Table H: male

|          | aa  | Aa   | AA  | Total_P3 |
|----------|-----|------|-----|----------|
| aa       | 103 | 2    | 0   | 105      |
| Aa       | 1   | 1019 | 0   | 1020     |
| AA       | 0   | 4    | 104 | 108      |
| Total_HC | 104 | 1025 | 104 | 1233     |

Table I: female

|          | aa   | Aa  | AA | Total_P3 |
|----------|------|-----|----|----------|
| aa       | 1041 | 0   | 0  | 1041     |
| Aa       | 2    | 201 | 0  | 203      |
| AA       | 0    | 2   | 25 | 27       |
| Total_HC | 1043 | 203 | 25 | 1271     |

Note1. Row (Phase 3 GRCh37); Column (High Coverage GRCh38)

Note2. 'a': REF; 'A': ALT

Region: PAR1

rs number (GRCh37 phase3): .

SNP position (GRCh37) = 2696893 ; Female-Male Sex Difference in MAF (GRCh37 phase3) = -0.4001 ;  
sdMAF P-value < 1e-300

SNP position (GRCh38) = 2778852 ; Female-Male Sex Difference in MAF (High Coverage) = -0.40047 ;  
sdMAF P-value < 1e-300

Table J: REF/ALT

|                 | REF | ALT |
|-----------------|-----|-----|
| Phase3 (GRCh37) | C   | T   |
| High Coverage   | C   | T   |

Table K: male

|          | aa  | Aa   | AA  | Total_P3 |
|----------|-----|------|-----|----------|
| aa       | 103 | 2    | 0   | 105      |
| Aa       | 1   | 1019 | 0   | 1020     |
| AA       | 0   | 4    | 104 | 108      |
| Total_HC | 104 | 1025 | 104 | 1233     |

Table L: female

|          | aa   | Aa  | AA | Total_P3 |
|----------|------|-----|----|----------|
| aa       | 1041 | 0   | 0  | 1041     |
| Aa       | 2    | 201 | 0  | 203      |
| AA       | 0    | 2   | 25 | 27       |
| Total_HC | 1043 | 203 | 25 | 1271     |

Note1. Row (Phase 3 GRCh37); Column (High Coverage GRCh38)

Note2. 'a': REF; 'A': ALT

Region: PAR1

rs number (GRCh37 phase3): .

SNP position (GRCh37) = 2697154 ; Female-Male Sex Difference in MAF (GRCh37 phase3) = -0.41948 ;  
sdMAF P-value < 1e-300

SNP position (GRCh38) = 2779113 ; Female-Male Sex Difference in MAF (High Coverage) = -0.4183 ;  
sdMAF P-value < 1e-300

Table M: REF/ALT

|                 | REF | ALT |
|-----------------|-----|-----|
| Phase3 (GRCh37) | A   | C   |
| High Coverage   | A   | C   |

Table N: male

|          | aa  | Aa   | AA | Total_P3 |
|----------|-----|------|----|----------|
| aa       | 106 | 2    | 0  | 108      |
| Aa       | 1   | 1040 | 2  | 1043     |
| AA       | 0   | 3    | 79 | 82       |
| Total_HC | 107 | 1045 | 81 | 1233     |

Table O: female

|          | aa   | Aa  | AA | Total_P3 |
|----------|------|-----|----|----------|
| aa       | 1097 | 3   | 0  | 1100     |
| Aa       | 1    | 162 | 1  | 164      |
| AA       | 0    | 0   | 7  | 7        |
| Total_HC | 1098 | 165 | 8  | 1271     |

Note1. Row (Phase 3 GRCh37); Column (High Coverage GRCh38)

Note2. 'a': REF; 'A': ALT

Region: PAR1

rs number (GRCh37 phase3): .

SNP position (GRCh37) = 2697599 ; Female-Male Sex Difference in MAF (GRCh37 phase3) = -0.461312 ;  
sdMAF P-value < 1e-300

SNP position (GRCh38) = 2779558 ; Female-Male Sex Difference in MAF (High Coverage) = -0.458793 ;  
sdMAF P-value < 1e-300

Table P: REF/ALT

|                 | REF | ALT |
|-----------------|-----|-----|
| Phase3 (GRCh37) | C   | A   |
| High Coverage   | C   | A   |

Table Q: male

|          | aa | Aa   | AA | Total_P3 |
|----------|----|------|----|----------|
| aa       | 88 | 2    | 0  | 90       |
| Aa       | 7  | 1125 | 0  | 1132     |
| AA       | 0  | 4    | 7  | 11       |
| Total_HC | 95 | 1131 | 7  | 1233     |

Table R: female

|          | aa   | Aa | AA | Total_P3 |
|----------|------|----|----|----------|
| aa       | 1253 | 1  | 0  | 1254     |
| Aa       | 4    | 13 | 0  | 17       |
| AA       | 0    | 0  | 0  | 0        |
| Total_HC | 1257 | 14 | 0  | 1271     |

Note1. Row (Phase 3 GRCh37); Column (High Coverage GRCh38)

Note2. 'a': REF; 'A': ALT

Region: PAR1

rs number (GRCh37 phase3): .

SNP position (GRCh37) = 2697845 ; Female-Male Sex Difference in MAF (GRCh37 phase3) = -0.42742 ;  
sdMAF P-value < 1e-300

SNP position (GRCh38) = 2779804 ; Female-Male Sex Difference in MAF (High Coverage) = -0.42582 ;  
sdMAF P-value < 1e-300

Table S: REF/ALT

|                 | REF | ALT |
|-----------------|-----|-----|
| Phase3 (GRCh37) | C   | T   |
| High Coverage   | C   | T   |

Table T: male

|          | aa | Aa   | AA | Total_P3 |
|----------|----|------|----|----------|
| aa       | 78 | 2    | 0  | 80       |
| Aa       | 1  | 1057 | 1  | 1059     |
| AA       | 0  | 5    | 89 | 94       |
| Total_HC | 79 | 1064 | 90 | 1233     |

Table U: female

|          | aa   | Aa  | AA | Total_P3 |
|----------|------|-----|----|----------|
| aa       | 1089 | 4   | 0  | 1093     |
| Aa       | 2    | 155 | 0  | 157      |
| AA       | 0    | 1   | 20 | 21       |
| Total_HC | 1091 | 160 | 20 | 1271     |

Note1. Row (Phase 3 GRCh37); Column (High Coverage GRCh38)

Note2. 'a': REF; 'A': ALT



Region: PAR1

rs number (GRCh37 phase3): .

SNP position (GRCh37) = 2697868 ; Female-Male Sex Difference in MAF (GRCh37 phase3) = -0.43172 ;  
sdMAF P-value < 1e-300

SNP position (GRCh38) = 2779827 ; Female-Male Sex Difference in MAF (High Coverage) = -0.43133 ;  
sdMAF P-value < 1e-300

Table V: REF/ALT

|                 | REF | ALT |
|-----------------|-----|-----|
| Phase3 (GRCh37) | G   | A   |
| High Coverage   | G   | A   |

Table W: male

|          | aa | Aa   | AA | Total_P3 |
|----------|----|------|----|----------|
| aa       | 78 | 2    | 0  | 80       |
| Aa       | 0  | 1059 | 3  | 1062     |
| AA       | 0  | 5    | 86 | 91       |
| Total_HC | 78 | 1066 | 89 | 1233     |

Table X: female

|          | aa   | Aa  | AA | Total_P3 |
|----------|------|-----|----|----------|
| aa       | 1100 | 4   | 0  | 1104     |
| Aa       | 2    | 147 | 0  | 149      |
| AA       | 0    | 1   | 17 | 18       |
| Total_HC | 1102 | 152 | 17 | 1271     |

Note1. Row (Phase 3 GRCh37); Column (High Coverage GRCh38)

Note2. 'a': REF; 'A': ALT

Region: PAR1

rs number (GRCh37 phase3): .

SNP position (GRCh37) = 2698923 ; Female-Male Sex Difference in MAF (GRCh37 phase3) = -0.46516 ;  
sdMAF P-value < 1e-300

SNP position (GRCh38) = 2780882 ; Female-Male Sex Difference in MAF (High Coverage) = -0.46225 ;  
sdMAF P-value < 1e-300

Table Y: REF/ALT

|                 | REF | ALT |
|-----------------|-----|-----|
| Phase3 (GRCh37) | G   | A   |
| High Coverage   | G   | A   |

Table Z: male

|          | aa | Aa   | AA | Total_P3 |
|----------|----|------|----|----------|
| aa       | 38 | 6    | 0  | 44       |
| Aa       | 6  | 1128 | 0  | 1134     |
| AA       | 0  | 8    | 47 | 55       |
| Total_HC | 44 | 1142 | 47 | 1233     |

Table AA: female

|          | aa   | Aa | AA | Total_P3 |
|----------|------|----|----|----------|
| aa       | 1178 | 0  | 0  | 1178     |
| Aa       | 0    | 85 | 1  | 86       |
| AA       | 0    | 2  | 5  | 7        |
| Total_HC | 1178 | 87 | 6  | 1271     |

Note1. Row (Phase 3 GRCh37); Column (High Coverage GRCh38)

Note2. 'a': REF; 'A': ALT

Region: PAR1

rs number (GRCh37 phase3): .

SNP position (GRCh37) = 2698954 ; Female-Male Sex Difference in MAF (GRCh37 phase3) = -0.427 ;  
sdMAF P-value < 1e-300

SNP position (GRCh38) = 2780913 ; Female-Male Sex Difference in MAF (High Coverage) = -0.4245 ;  
sdMAF P-value < 1e-300

Table AB: REF/ALT

|                 | REF | ALT |
|-----------------|-----|-----|
| Phase3 (GRCh37) | G   | A   |
| High Coverage   | G   | A   |

Table AC: male

|          | aa | Aa   | AA  | Total_P3 |
|----------|----|------|-----|----------|
| aa       | 37 | 5    | 0   | 42       |
| Aa       | 1  | 1011 | 1   | 1013     |
| AA       | 0  | 10   | 168 | 178      |
| Total_HC | 38 | 1026 | 169 | 1233     |

Table AD: female

|          | aa  | Aa  | AA | Total_P3 |
|----------|-----|-----|----|----------|
| aa       | 975 | 4   | 0  | 979      |
| Aa       | 3   | 254 | 1  | 258      |
| AA       | 0   | 1   | 33 | 34       |
| Total_HC | 978 | 259 | 34 | 1271     |

Note1. Row (Phase 3 GRCh37); Column (High Coverage GRCh38)

Note2. 'a': REF; 'A': ALT

Region: NPR

rs number (GRCh37 phase3): rs1996225

SNP position (GRCh37) = 15711209 ; Female-Male Sex Difference in MAF (GRCh37 phase3) = 0.2344 ;

sdMAF P-value = 1.55380206985061e-60

SNP position (GRCh38) = 15693086 ; Female-Male Sex Difference in MAF (High Coverage) = 0.0352 ;

sdMAF P-value = 0.0251232744816044

Table AE: REF/ALT

|                 | REF | ALT |
|-----------------|-----|-----|
| Phase3 (GRCh37) | C   | T   |
| High Coverage   | C   | T   |

Table AF: male

|          | a   | A   | Total_P3 |
|----------|-----|-----|----------|
| a        | 315 | 11  | 326      |
| A        | 0   | 907 | 907      |
| Total_HC | 315 | 918 | 1233     |

Table AG: female

|          | aa  | Aa  | AA  | Total_P3 |
|----------|-----|-----|-----|----------|
| aa       | 147 | 1   | 0   | 148      |
| Aa       | 0   | 444 | 528 | 972      |
| AA       | 0   | 0   | 151 | 151      |
| Total_HC | 147 | 445 | 679 | 1271     |

Note1. Row (Phase 3 GRCh37); Column (High Coverage GRCh38)

Note2. 'a': REF; 'A': ALT

Region: NPR

rs number (GRCh37 phase3): rs372984882

SNP position (GRCh37) = 88383111 ; Female-Male Sex Difference in MAF (GRCh37 phase3) = 0.28941 ;  
sdMAF P-value = 3.9737450506146e-213

SNP position (GRCh38) = 89128111 ; Female-Male Sex Difference in MAF (High Coverage) = 0.00236 ;  
sdMAF P-value = 0.0140770215674526

Table AH: REF/ALT

|                 | REF | ALT |
|-----------------|-----|-----|
| Phase3 (GRCh37) | A   | T   |
| High Coverage   | A   | T   |

Table AI: male

|          | a    | A | Total_P3 |
|----------|------|---|----------|
| a        | 1161 | 0 | 1161     |
| A        | 72   | 0 | 72       |
| Total_HC | 1233 | 0 | 1233     |

Table AJ: female

|          | aa   | Aa | AA | Total_P3 |
|----------|------|----|----|----------|
| aa       | 384  | 3  | 0  | 387      |
| Aa       | 881  | 3  | 0  | 884      |
| AA       | 0    | 0  | 0  | 0        |
| Total_HC | 1265 | 6  | 0  | 1271     |

Note1. Row (Phase 3 GRCh37); Column (High Coverage GRCh38)

Note2. 'a': REF; 'A': ALT

Region: NPR

rs number (GRCh37 phase3): rs369028615

SNP position (GRCh37) = 88383115 ; Female-Male Sex Difference in MAF (GRCh37 phase3) = 0.28941 ;

sdMAF P-value = 3.9737450506146e-213

SNP position (GRCh38) = 89128115 ; Female-Male Sex Difference in MAF (High Coverage) = 0.00236 ;

sdMAF P-value = 0.0140770215674526

Table AK: REF/ALT

|                 | REF | ALT |
|-----------------|-----|-----|
| Phase3 (GRCh37) | C   | T   |
| High Coverage   | C   | T   |

Table AL: male

|          | a    | A | Total_P3 |
|----------|------|---|----------|
| a        | 1161 | 0 | 1161     |
| A        | 72   | 0 | 72       |
| Total_HC | 1233 | 0 | 1233     |

Table AM: female

|          | aa   | Aa | AA | Total_P3 |
|----------|------|----|----|----------|
| aa       | 384  | 3  | 0  | 387      |
| Aa       | 881  | 3  | 0  | 884      |
| AA       | 0    | 0  | 0  | 0        |
| Total_HC | 1265 | 6  | 0  | 1271     |

Note1. Row (Phase 3 GRCh37); Column (High Coverage GRCh38)

Note2. 'a': REF; 'A': ALT

Region: PAR3

rs number (GRCh37 phase3): .

SNP position (GRCh37) = 88458816 ; Female-Male Sex Difference in MAF (GRCh37 phase3) = 0.16151 ;  
sdMAF P-value = 2.25662814279251e-56

SNP position (GRCh38) = 89203817 ; Female-Male Sex Difference in MAF (High Coverage) = 0.04013 ;  
sdMAF P-value = 6.22346860302191e-26

Table AN: REF/ALT

|                 | REF | ALT |
|-----------------|-----|-----|
| Phase3 (GRCh37) | G   | A   |
| High Coverage   | G   | A   |

Table AO: male

|          | a    | A | Total_P3 |
|----------|------|---|----------|
| a        | 1143 | 0 | 1143     |
| A        | 90   | 0 | 90       |
| Total_HC | 1233 | 0 | 1233     |

Table AP: female

|          | aa   | Aa  | AA | Total_P3 |
|----------|------|-----|----|----------|
| aa       | 649  | 27  | 0  | 676      |
| Aa       | 519  | 75  | 0  | 594      |
| AA       | 1    | 0   | 0  | 1        |
| Total_HC | 1169 | 102 | 0  | 1271     |

Note1. Row (Phase 3 GRCh37); Column (High Coverage GRCh38)

Note2. 'a': REF; 'A': ALT

Region: PAR3

rs number (GRCh37 phase3): .

SNP position (GRCh37) = 88458918 ; Female-Male Sex Difference in MAF (GRCh37 phase3) = 0.1504 ;  
sdMAF P-value = 3.10020205638595e-48

SNP position (GRCh38) = 89203919 ; Female-Male Sex Difference in MAF (High Coverage) = 0.04917 ;  
sdMAF P-value = 5.29484546944359e-32

Table AQ: REF/ALT

|                 | REF | ALT |
|-----------------|-----|-----|
| Phase3 (GRCh37) | A   | G   |
| High Coverage   | A   | G   |

Table AR: male

|          | a    | A | Total_P3 |
|----------|------|---|----------|
| a        | 1142 | 0 | 1142     |
| A        | 91   | 0 | 91       |
| Total_HC | 1233 | 0 | 1233     |

Table AS: female

|          | aa   | Aa  | AA | Total_P3 |
|----------|------|-----|----|----------|
| aa       | 651  | 57  | 0  | 708      |
| Aa       | 490  | 66  | 0  | 556      |
| AA       | 5    | 2   | 0  | 7        |
| Total_HC | 1146 | 125 | 0  | 1271     |

Note1. Row (Phase 3 GRCh37); Column (High Coverage GRCh38)

Note2. 'a': REF; 'A': ALT



Region: PAR3

rs number (GRCh37 phase3): rs370154167

SNP position (GRCh37) = 88460271 ; Female-Male Sex Difference in MAF (GRCh37 phase3) = 0.2629 ;  
sdMAF P-value = 9.87188301068426e-132

SNP position (GRCh38) = 89205272 ; Female-Male Sex Difference in MAF (High Coverage) = 0.002754 ;  
sdMAF P-value = 0.00797639777080226

Table AT: REF/ALT

|                 | REF | ALT |
|-----------------|-----|-----|
| Phase3 (GRCh37) | G   | A   |
| High Coverage   | G   | A   |

Table AU: male

|          | a    | A | Total_P3 |
|----------|------|---|----------|
| a        | 1108 | 0 | 1108     |
| A        | 125  | 0 | 125      |
| Total_HC | 1233 | 0 | 1233     |

Table AV: female

|          | aa   | Aa | AA | Total_P3 |
|----------|------|----|----|----------|
| aa       | 354  | 1  | 0  | 355      |
| Aa       | 900  | 6  | 0  | 906      |
| AA       | 10   | 0  | 0  | 10       |
| Total_HC | 1264 | 7  | 0  | 1271     |

Note1. Row (Phase 3 GRCh37); Column (High Coverage GRCh38)

Note2. 'a': REF; 'A': ALT

Region: PAR3

rs number (GRCh37 phase3): .

SNP position (GRCh37) = 88460457 ; Female-Male Sex Difference in MAF (GRCh37 phase3) = 0.125 ;  
sdMAF P-value = 3.85096879960068e-45

SNP position (GRCh38) = 89205458 ; Female-Male Sex Difference in MAF (High Coverage) = -2.42e-05 ;  
sdMAF P-value = 0.980320072234104

Table AW: REF/ALT

|                 | REF | ALT |
|-----------------|-----|-----|
| Phase3 (GRCh37) | G   | A   |
| High Coverage   | G   | C   |

Table AX: male

|          | a    | A | Total_P3 |
|----------|------|---|----------|
| a        | 1178 | 1 | 1179     |
| A        | 54   | 0 | 54       |
| Total_HC | 1232 | 1 | 1233     |

Table AY: female

|          | aa   | Aa | AA | Total_P3 |
|----------|------|----|----|----------|
| aa       | 842  | 2  | 0  | 844      |
| Aa       | 425  | 0  | 0  | 425      |
| AA       | 2    | 0  | 0  | 2        |
| Total_HC | 1269 | 2  | 0  | 1271     |

Note1. Row (Phase 3 GRCh37); Column (High Coverage GRCh38)

Note2. 'a': REF; 'A': ALT

Region: PAR3

rs number (GRCh37 phase3): .

SNP position (GRCh37) = 88460883 ; Female-Male Sex Difference in MAF (GRCh37 phase3) = 0.0985 ;  
sdMAF P-value = 3.54405130280993e-13

SNP position (GRCh38) = 89205884 ; Female-Male Sex Difference in MAF (High Coverage) = 0.015911 ;  
sdMAF P-value = 3.74164715957335e-05

Table AZ: REF/ALT

|                 | REF | ALT |
|-----------------|-----|-----|
| Phase3 (GRCh37) | G   | A   |
| High Coverage   | G   | A   |

Table BA: male

|          | a    | A | Total_P3 |
|----------|------|---|----------|
| a        | 978  | 5 | 983      |
| A        | 246  | 4 | 250      |
| Total_HC | 1224 | 9 | 1233     |

Table BB: female

|          | aa   | Aa | AA | Total_P3 |
|----------|------|----|----|----------|
| aa       | 504  | 19 | 0  | 523      |
| Aa       | 692  | 37 | 1  | 730      |
| AA       | 17   | 1  | 0  | 18       |
| Total_HC | 1213 | 57 | 1  | 1271     |

Note1. Row (Phase 3 GRCh37); Column (High Coverage GRCh38)

Note2. 'a': REF; 'A': ALT

Region: PAR3

rs number (GRCh37 phase3): rs199820323

SNP position (GRCh37) = 89192798 ; Female-Male Sex Difference in MAF (GRCh37 phase3) = 0.10024 ;  
sdMAF P-value = 4.78641113314677e-32

SNP position (GRCh38) = 89937799 ; Female-Male Sex Difference in MAF (High Coverage) = -0.00602 ;  
sdMAF P-value = 0.157584761057514

Table BC: REF/ALT

|                 | REF | ALT |
|-----------------|-----|-----|
| Phase3 (GRCh37) | C   | A   |
| High Coverage   | C   | A   |

Table BD: male

|          | a    | A  | Total_P3 |
|----------|------|----|----------|
| a        | 1182 | 0  | 1182     |
| A        | 30   | 21 | 51       |
| Total_HC | 1212 | 21 | 1233     |

Table BE: female

|          | aa   | Aa | AA | Total_P3 |
|----------|------|----|----|----------|
| aa       | 911  | 1  | 0  | 912      |
| Aa       | 333  | 25 | 0  | 358      |
| AA       | 0    | 0  | 1  | 1        |
| Total_HC | 1244 | 26 | 1  | 1271     |

Note1. Row (Phase 3 GRCh37); Column (High Coverage GRCh38)

Note2. 'a': REF; 'A': ALT

Region: PAR3

rs number (GRCh37 phase3): rs113948071

SNP position (GRCh37) = 89803933 ; Female-Male Sex Difference in MAF (GRCh37 phase3) = 0.12154 ;  
sdMAF P-value = 2.45504806968182e-44

SNP position (GRCh38) = 90548934 ; Female-Male Sex Difference in MAF (High Coverage) = -0.000811 ;  
sdMAF P-value = 0.31711418273145

Table BF: REF/ALT

|                 | REF | ALT |
|-----------------|-----|-----|
| Phase3 (GRCh37) | A   | C   |
| High Coverage   | A   | C   |

Table BG: male

|          | a    | A | Total_P3 |
|----------|------|---|----------|
| a        | 1182 | 0 | 1182     |
| A        | 50   | 1 | 51       |
| Total_HC | 1232 | 1 | 1233     |

Table BH: female

|          | aa   | Aa | AA | Total_P3 |
|----------|------|----|----|----------|
| aa       | 858  | 0  | 0  | 858      |
| Aa       | 412  | 0  | 0  | 412      |
| AA       | 1    | 0  | 0  | 1        |
| Total_HC | 1271 | 0  | 0  | 1271     |

Note1. Row (Phase 3 GRCh37); Column (High Coverage GRCh38)

Note2. 'a': REF; 'A': ALT

Region: PAR3

rs number (GRCh37 phase3): rs75914390

SNP position (GRCh37) = 90420559 ; Female-Male Sex Difference in MAF (GRCh37 phase3) = 0.13493 ;  
sdMAF P-value = 1.83772278515363e-34

SNP position (GRCh38) = 91165560 ; Female-Male Sex Difference in MAF (High Coverage) = 0.00849 ;  
sdMAF P-value = 0.308025448569295

Table BI: REF/ALT

|                 | REF | ALT |
|-----------------|-----|-----|
| Phase3 (GRCh37) | C   | G   |
| High Coverage   | C   | G   |

Table BJ: male

|          | a    | A  | Total_P3 |
|----------|------|----|----------|
| a        | 1118 | 0  | 1118     |
| A        | 43   | 72 | 115      |
| Total_HC | 1161 | 72 | 1233     |

Table BK: female

|          | aa   | Aa  | AA | Total_P3 |
|----------|------|-----|----|----------|
| aa       | 704  | 0   | 0  | 704      |
| Aa       | 402  | 152 | 0  | 554      |
| AA       | 1    | 6   | 6  | 13       |
| Total_HC | 1107 | 158 | 6  | 1271     |

Note1. Row (Phase 3 GRCh37); Column (High Coverage GRCh38)

Note2. 'a': REF; 'A': ALT

Region: PAR3

rs number (GRCh37 phase3): rs56118643

SNP position (GRCh37) = 90471772 ; Female-Male Sex Difference in MAF (GRCh37 phase3) = -0.0863 ;  
sdMAF P-value = 7.46065572919066e-08

SNP position (GRCh38) = 91216773 ; Female-Male Sex Difference in MAF (High Coverage) = -0.0031 ;  
sdMAF P-value = 0.853222915843523

Table BL: REF/ALT

|                 | REF | ALT |
|-----------------|-----|-----|
| Phase3 (GRCh37) | T   | A   |
| High Coverage   | T   | A   |

Table BM: male

|          | a   | A   | Total_P3 |
|----------|-----|-----|----------|
| a        | 812 | 55  | 867      |
| A        | 1   | 365 | 366      |
| Total_HC | 813 | 420 | 1233     |

Table BN: female

|          | aa  | Aa  | AA  | Total_P3 |
|----------|-----|-----|-----|----------|
| aa       | 584 | 275 | 8   | 867      |
| Aa       | 10  | 221 | 42  | 273      |
| AA       | 0   | 0   | 131 | 131      |
| Total_HC | 594 | 496 | 181 | 1271     |

Note1. Row (Phase 3 GRCh37); Column (High Coverage GRCh38)

Note2. 'a': REF; 'A': ALT

Region: NPR

rs number (GRCh37 phase3): rs6637609

SNP position (GRCh37) = 128638559 ; Female-Male Sex Difference in MAF (GRCh37 phase3) = 0.2211 ;

sdMAF P-value = 6.54681396294046e-63

SNP position (GRCh38) = 129504582 ; Female-Male Sex Difference in MAF (High Coverage) = 0.021 ;

sdMAF P-value = 0.0770279808229025

Table BO: REF/ALT

|                 | REF | ALT |
|-----------------|-----|-----|
| Phase3 (GRCh37) | C   | A   |
| High Coverage   | C   | A   |

Table BP: male

|          | a    | A   | Total_P3 |
|----------|------|-----|----------|
| a        | 920  | 3   | 923      |
| A        | 157  | 153 | 310      |
| Total_HC | 1077 | 156 | 1233     |

Table BQ: female

|          | aa  | Aa  | AA | Total_P3 |
|----------|-----|-----|----|----------|
| aa       | 102 | 5   | 0  | 107      |
| Aa       | 826 | 300 | 1  | 1127     |
| AA       | 2   | 2   | 33 | 37       |
| Total_HC | 930 | 307 | 34 | 1271     |

Note1. Row (Phase 3 GRCh37); Column (High Coverage GRCh38)

Note2. 'a': REF; 'A': ALT



Region: PAR2

rs number (GRCh37 phase3): .

SNP position (GRCh37) = 154934428 ; Female-Male Sex Difference in MAF (GRCh37 phase3) = 0.3434 ;

sdMAF P-value = 1.22828740905784e-169

SNP position (GRCh38) = 155704767 ; Female-Male Sex Difference in MAF (High Coverage) = 0.3442 ;

sdMAF P-value = 5.16020258391841e-171

Table BR: REF/ALT

|                 | REF | ALT |
|-----------------|-----|-----|
| Phase3 (GRCh37) | T   | G   |
| High Coverage   | T   | G   |

Table BS: male

|          | aa | Aa  | AA  | Total_P3 |
|----------|----|-----|-----|----------|
| aa       | 1  | 1   | 0   | 2        |
| Aa       | 0  | 745 | 0   | 745      |
| AA       | 0  | 0   | 486 | 486      |
| Total_HC | 1  | 746 | 486 | 1233     |

Table BT: female

|          | aa  | Aa  | AA  | Total_P3 |
|----------|-----|-----|-----|----------|
| aa       | 578 | 0   | 0   | 578      |
| Aa       | 0   | 489 | 0   | 489      |
| AA       | 0   | 1   | 203 | 204      |
| Total_HC | 578 | 490 | 203 | 1271     |

Note1. Row (Phase 3 GRCh37); Column (High Coverage GRCh38)

Note2. 'a': REF; 'A': ALT

Region: PAR2

rs number (GRCh37 phase3): .

SNP position (GRCh37) = 154934986 ; Female-Male Sex Difference in MAF (GRCh37 phase3) = 0.3433 ;

sdMAF P-value = 4.76760207367504e-169

SNP position (GRCh38) = 155705325 ; Female-Male Sex Difference in MAF (High Coverage) = 0.3458 ;

sdMAF P-value = 5.65681734446808e-173

Table BU: REF/ALT

|                 | REF | ALT |
|-----------------|-----|-----|
| Phase3 (GRCh37) | G   | A   |
| High Coverage   | G   | A   |

Table BV: male

|          | aa | Aa  | AA  | Total_P3 |
|----------|----|-----|-----|----------|
| aa       | 1  | 5   | 0   | 6        |
| Aa       | 0  | 741 | 0   | 741      |
| AA       | 0  | 0   | 486 | 486      |
| Total_HC | 1  | 746 | 486 | 1233     |

Table BW: female

|          | aa  | Aa  | AA  | Total_P3 |
|----------|-----|-----|-----|----------|
| aa       | 578 | 1   | 0   | 579      |
| Aa       | 2   | 489 | 0   | 491      |
| AA       | 0   | 0   | 201 | 201      |
| Total_HC | 580 | 490 | 201 | 1271     |

Note1. Row (Phase 3 GRCh37); Column (High Coverage GRCh38)

Note2. 'a': REF; 'A': ALT

Region: PAR2

rs number (GRCh37 phase3): .

SNP position (GRCh37) = 154938547 ; Female-Male Sex Difference in MAF (GRCh37 phase3) = 0.343 ;  
sdMAF P-value = 2.93224328230306e-169

SNP position (GRCh38) = 155708886 ; Female-Male Sex Difference in MAF (High Coverage) = 0.3434 ;  
sdMAF P-value = 2.95168132842575e-169

Table BX: REF/ALT

|                 | REF | ALT |
|-----------------|-----|-----|
| Phase3 (GRCh37) | T   | C   |
| High Coverage   | T   | C   |

Table BY: male

|          | aa | Aa  | AA  | Total_P3 |
|----------|----|-----|-----|----------|
| aa       | 2  | 1   | 0   | 3        |
| Aa       | 0  | 744 | 0   | 744      |
| AA       | 0  | 1   | 485 | 486      |
| Total_HC | 2  | 746 | 485 | 1233     |

Table BZ: female

|          | aa  | Aa  | AA  | Total_P3 |
|----------|-----|-----|-----|----------|
| aa       | 577 | 0   | 0   | 577      |
| Aa       | 3   | 486 | 2   | 491      |
| AA       | 0   | 0   | 203 | 203      |
| Total_HC | 580 | 486 | 205 | 1271     |

Note1. Row (Phase 3 GRCh37); Column (High Coverage GRCh38)

Note2. 'a': REF; 'A': ALT

Region: PAR2

rs number (GRCh37 phase3): .

SNP position (GRCh37) = 154950587 ; Female-Male Sex Difference in MAF (GRCh37 phase3) = -0.4092 ;  
sdMAF P-value < 1e-300

SNP position (GRCh38) = 155720925 ; Female-Male Sex Difference in MAF (High Coverage) = -0.41 ;  
sdMAF P-value < 1e-300

Table CA: REF/ALT

|                 | REF | ALT |
|-----------------|-----|-----|
| Phase3 (GRCh37) | T   | C   |
| High Coverage   | T   | C   |

Table CB: male

|          | aa | Aa  | AA  | Total_P3 |
|----------|----|-----|-----|----------|
| aa       | 21 | 1   | 0   | 22       |
| Aa       | 0  | 953 | 1   | 954      |
| AA       | 0  | 0   | 257 | 257      |
| Total_HC | 21 | 954 | 258 | 1233     |

Table CC: female

|          | aa  | Aa  | AA | Total_P3 |
|----------|-----|-----|----|----------|
| aa       | 859 | 0   | 0  | 859      |
| Aa       | 0   | 349 | 2  | 351      |
| AA       | 0   | 2   | 59 | 61       |
| Total_HC | 859 | 351 | 61 | 1271     |

Note1. Row (Phase 3 GRCh37); Column (High Coverage GRCh38)

Note2. 'a': REF; 'A': ALT

Region: PAR2

rs number (GRCh37 phase3): .

SNP position (GRCh37) = 154954348 ; Female-Male Sex Difference in MAF (GRCh37 phase3) = -0.408 ;  
sdMAF P-value < 1e-300

SNP position (GRCh38) = 155724686 ; Female-Male Sex Difference in MAF (High Coverage) = -0.4084 ;  
sdMAF P-value < 1e-300

Table CD: REF/ALT

|                 | REF | ALT |
|-----------------|-----|-----|
| Phase3 (GRCh37) | C   | T   |
| High Coverage   | C   | T   |

Table CE: male

|          | aa | Aa  | AA  | Total_P3 |
|----------|----|-----|-----|----------|
| aa       | 23 | 1   | 0   | 24       |
| Aa       | 1  | 952 | 0   | 953      |
| AA       | 0  | 0   | 256 | 256      |
| Total_HC | 24 | 953 | 256 | 1233     |

Table CF: female

|          | aa  | Aa  | AA | Total_P3 |
|----------|-----|-----|----|----------|
| aa       | 859 | 0   | 0  | 859      |
| Aa       | 0   | 351 | 0  | 351      |
| AA       | 0   | 1   | 60 | 61       |
| Total_HC | 859 | 352 | 60 | 1271     |

Note1. Row (Phase 3 GRCh37); Column (High Coverage GRCh38)

Note2. 'a': REF; 'A': ALT

Region: PAR2

rs number (GRCh37 phase3): .

SNP position (GRCh37) = 154954591 ; Female-Male Sex Difference in MAF (GRCh37 phase3) = -0.408 ;  
sdMAF P-value < 1e-300

SNP position (GRCh38) = 155724929 ; Female-Male Sex Difference in MAF (High Coverage) = -0.4088 ;  
sdMAF P-value < 1e-300

Table CG: REF/ALT

|                 | REF | ALT |
|-----------------|-----|-----|
| Phase3 (GRCh37) | C   | G   |
| High Coverage   | C   | G   |

Table CH: male

|          | aa | Aa  | AA  | Total_P3 |
|----------|----|-----|-----|----------|
| aa       | 22 | 1   | 0   | 23       |
| Aa       | 0  | 952 | 0   | 952      |
| AA       | 0  | 0   | 258 | 258      |
| Total_HC | 22 | 953 | 258 | 1233     |

Table CI: female

|          | aa  | Aa  | AA | Total_P3 |
|----------|-----|-----|----|----------|
| aa       | 855 | 1   | 0  | 856      |
| Aa       | 0   | 354 | 0  | 354      |
| AA       | 0   | 2   | 59 | 61       |
| Total_HC | 855 | 357 | 59 | 1271     |

Note1. Row (Phase 3 GRCh37); Column (High Coverage GRCh38)

Note2. 'a': REF; 'A': ALT

Region: PAR2

rs number (GRCh37 phase3): .

SNP position (GRCh37) = 154957867 ; Female-Male Sex Difference in MAF (GRCh37 phase3) = -0.4088 ;  
sdMAF P-value < 1e-300

SNP position (GRCh38) = 155728205 ; Female-Male Sex Difference in MAF (High Coverage) = -0.4088 ;  
sdMAF P-value < 1e-300

Table CJ: REF/ALT

|                 | REF | ALT |
|-----------------|-----|-----|
| Phase3 (GRCh37) | C   | A   |
| High Coverage   | C   | A   |

Table CK: male

|          | aa | Aa  | AA  | Total_P3 |
|----------|----|-----|-----|----------|
| aa       | 22 | 0   | 0   | 22       |
| Aa       | 0  | 952 | 0   | 952      |
| AA       | 0  | 0   | 259 | 259      |
| Total_HC | 22 | 952 | 259 | 1233     |

Table CL: female

|          | aa  | Aa  | AA | Total_P3 |
|----------|-----|-----|----|----------|
| aa       | 857 | 1   | 0  | 858      |
| Aa       | 0   | 350 | 0  | 350      |
| AA       | 0   | 1   | 62 | 63       |
| Total_HC | 857 | 352 | 62 | 1271     |

Note1. Row (Phase 3 GRCh37); Column (High Coverage GRCh38)

Note2. 'a': REF; 'A': ALT

Region: PAR2

rs number (GRCh37 phase3): .

SNP position (GRCh37) = 154969038 ; Female-Male Sex Difference in MAF (GRCh37 phase3) = -0.3985 ;  
sdMAF P-value < 1e-300

SNP position (GRCh38) = 155739376 ; Female-Male Sex Difference in MAF (High Coverage) = -0.3973 ;  
sdMAF P-value < 1e-300

Table CM: REF/ALT

|                 | REF | ALT |
|-----------------|-----|-----|
| Phase3 (GRCh37) | T   | C   |
| High Coverage   | T   | C   |

Table CN: male

|          | aa | Aa  | AA  | Total_P3 |
|----------|----|-----|-----|----------|
| aa       | 21 | 2   | 0   | 23       |
| Aa       | 1  | 926 | 2   | 929      |
| AA       | 0  | 0   | 281 | 281      |
| Total_HC | 22 | 928 | 283 | 1233     |

Table CO: female

|          | aa  | Aa  | AA | Total_P3 |
|----------|-----|-----|----|----------|
| aa       | 812 | 4   | 0  | 816      |
| Aa       | 0   | 384 | 2  | 386      |
| AA       | 0   | 0   | 69 | 69       |
| Total_HC | 812 | 388 | 71 | 1271     |

Note1. Row (Phase 3 GRCh37); Column (High Coverage GRCh38)

Note2. 'a': REF; 'A': ALT



Region: PAR2

rs number (GRCh37 phase3): .

SNP position (GRCh37) = 154971425 ; Female-Male Sex Difference in MAF (GRCh37 phase3) = -0.3978 ;  
sdMAF P-value < 1e-300

SNP position (GRCh38) = 155741763 ; Female-Male Sex Difference in MAF (High Coverage) = -0.3974 ;  
sdMAF P-value < 1e-300

Table CP: REF/ALT

|                 | REF | ALT |
|-----------------|-----|-----|
| Phase3 (GRCh37) | A   | C   |
| High Coverage   | A   | C   |

Table CQ: male

|          | aa | Aa  | AA  | Total_P3 |
|----------|----|-----|-----|----------|
| aa       | 37 | 0   | 0   | 37       |
| Aa       | 0  | 931 | 1   | 932      |
| AA       | 0  | 0   | 264 | 264      |
| Total_HC | 37 | 931 | 265 | 1233     |

Table CR: female

|          | aa  | Aa  | AA | Total_P3 |
|----------|-----|-----|----|----------|
| aa       | 841 | 2   | 0  | 843      |
| Aa       | 0   | 361 | 1  | 362      |
| AA       | 0   | 1   | 65 | 66       |
| Total_HC | 841 | 364 | 66 | 1271     |

Note1. Row (Phase 3 GRCh37); Column (High Coverage GRCh38)

Note2. 'a': REF; 'A': ALT

Region: PAR2

rs number (GRCh37 phase3): .

SNP position (GRCh37) = 154977261 ; Female-Male Sex Difference in MAF (GRCh37 phase3) = -0.3584 ;

sdMAF P-value = 3.6584742279397e-212

SNP position (GRCh38) = 155747599 ; Female-Male Sex Difference in MAF (High Coverage) = -0.3553 ;

sdMAF P-value = 2.97098408770581e-205

Table CS: REF/ALT

|                 | REF | ALT |
|-----------------|-----|-----|
| Phase3 (GRCh37) | T   | C   |
| High Coverage   | T   | C   |

Table CT: male

|          | aa | Aa  | AA  | Total_P3 |
|----------|----|-----|-----|----------|
| aa       | 28 | 0   | 0   | 28       |
| Aa       | 2  | 830 | 14  | 846      |
| AA       | 0  | 11  | 348 | 359      |
| Total_HC | 30 | 841 | 362 | 1233     |

Table CU: female

|          | aa  | Aa  | AA  | Total_P3 |
|----------|-----|-----|-----|----------|
| aa       | 675 | 9   | 0   | 684      |
| Aa       | 5   | 461 | 7   | 473      |
| AA       | 0   | 2   | 112 | 114      |
| Total_HC | 680 | 472 | 119 | 1271     |

Note1. Row (Phase 3 GRCh37); Column (High Coverage GRCh38)

Note2. 'a': REF; 'A': ALT
